# Supplementary material for: Polarized SERS substrates with directionality, repeatability and orderability: an anisotropic Ag nanocavity array
Source: Royal Society of Chemistry journal article supplement (doi:10.1039/d2tc02872g), 2022-01-01
Supplement: d2tc02872g1.pdf [file d2tc02872g1.pdf]

## Supporting Information

### Polarized SERS substrate with directionality, repeatability and orderability: Anisotropic Ag nanocavity array

Xiuxia Tang<sup>a</sup>, Xiaoyu Zhao<sup>a\*</sup>, Jiahong Wen<sup>b,d</sup>, Jia Liu<sup>a</sup>, Fengyi Zhang<sup>a</sup>, Xiaojie Guo<sup>a</sup>, Kun Zhang<sup>a</sup>, Jian Zhang<sup>a</sup>, Aofang Wang<sup>c</sup>, Renxian Gao<sup>e</sup>, Yaxin Wang<sup>a</sup>, Yongjun Zhang<sup>a\*</sup>

(a) College of Materials and Environmental Engineering, Hangzhou Dianzi University, Hangzhou 310018, P. R. China

(b) The College of Electronics and Information, Hangzhou Dianzi University, Hangzhou 310018, P. R. China

(c) Medical School of Hangzhou Dianzi University, Hangzhou 310018, P. R. China

(d) Zhejiang Laboratory, Hangzhou 311100, P. R. China

(e) College of Physical Science and Technology, Xiamen University, Xiamen 361005, P. R. China

Corresponding Authors: Xiaoyu Zhao [zhaoxy@hdu.edu.cn](mailto:zhaoxy@hdu.edu.cn); Yongjun Zhang, [yjzhang@hdu.edu.cn](mailto:yjzhang@hdu.edu.cn);

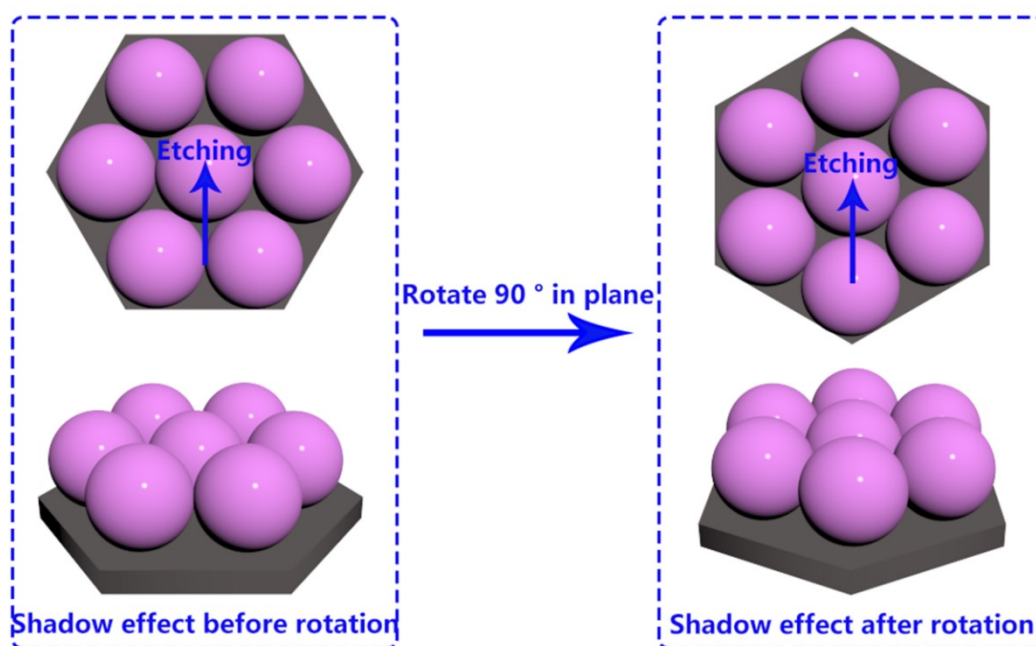

**Fig.S1** Schematic diagram of shadow effect of Ag nanospheres array rotated 90° in the plane.

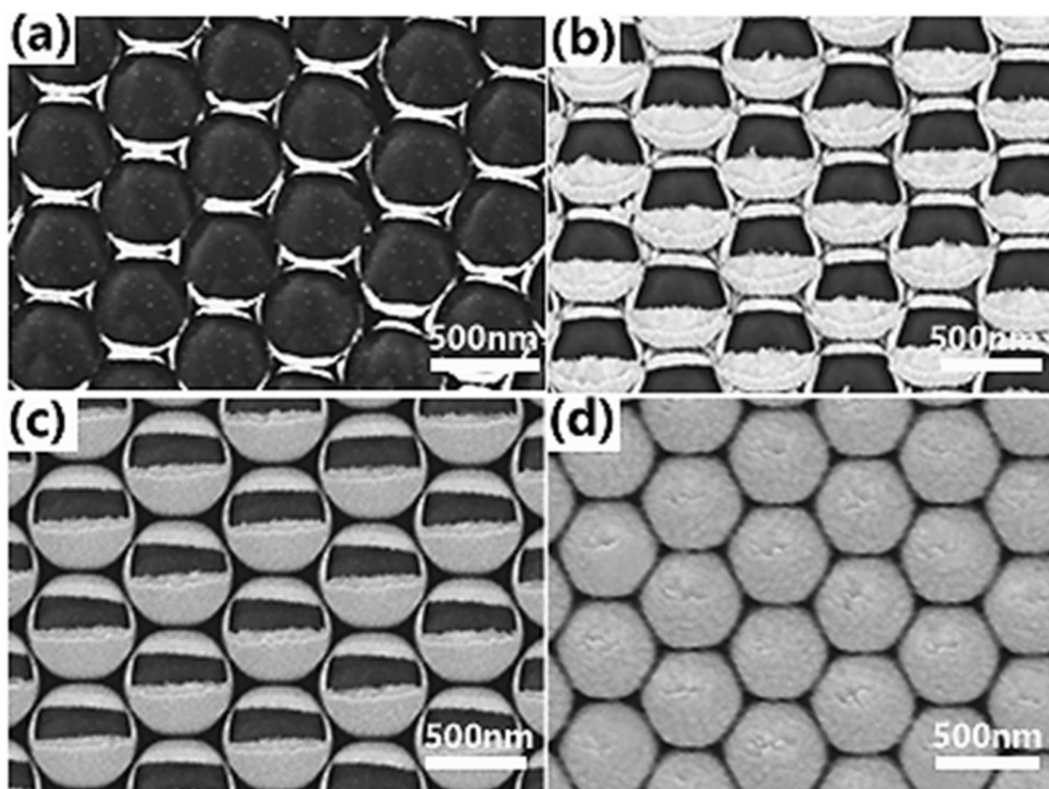

**Fig. S2** After the sample was rotated 90 ° in the plane, SEM diagram formed by sub-beam etching of samples, the etching angles were 30 °, 45 °, 60 ° and 75 °.

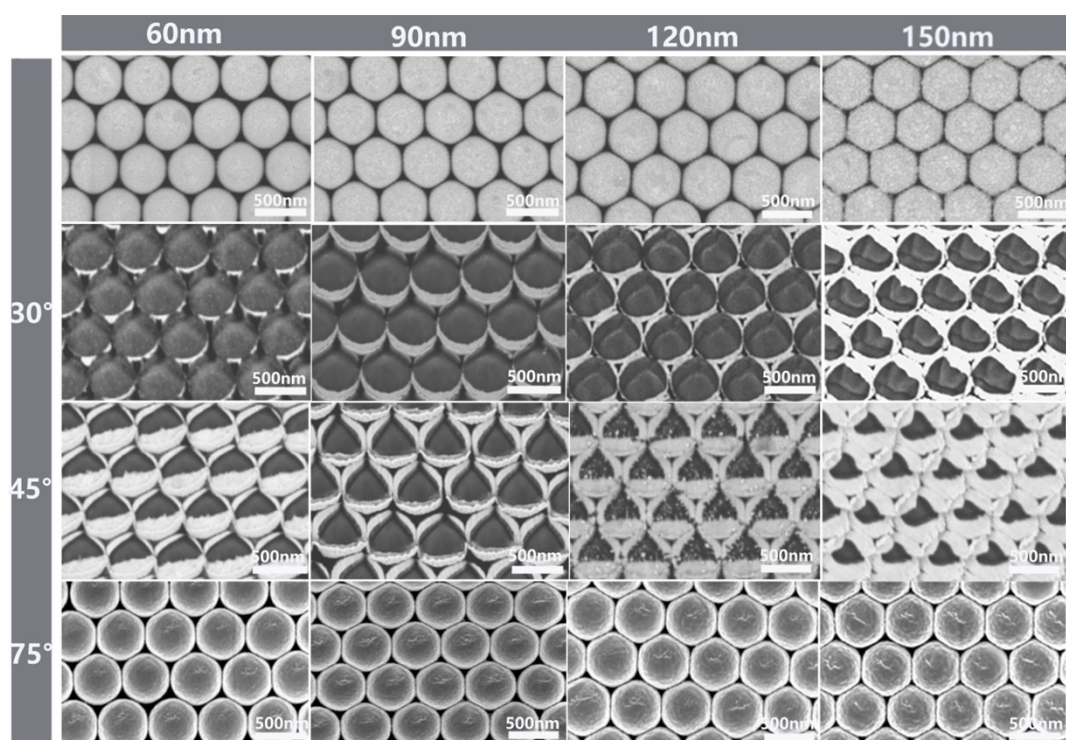

**Fig. S3** The SEM diagrams were obtained by depositing of 60nm,90nm,120nm,150nm silver film on PS, and then etched at an etching angle of 30 °, 45 ° and 75 °, respectively.

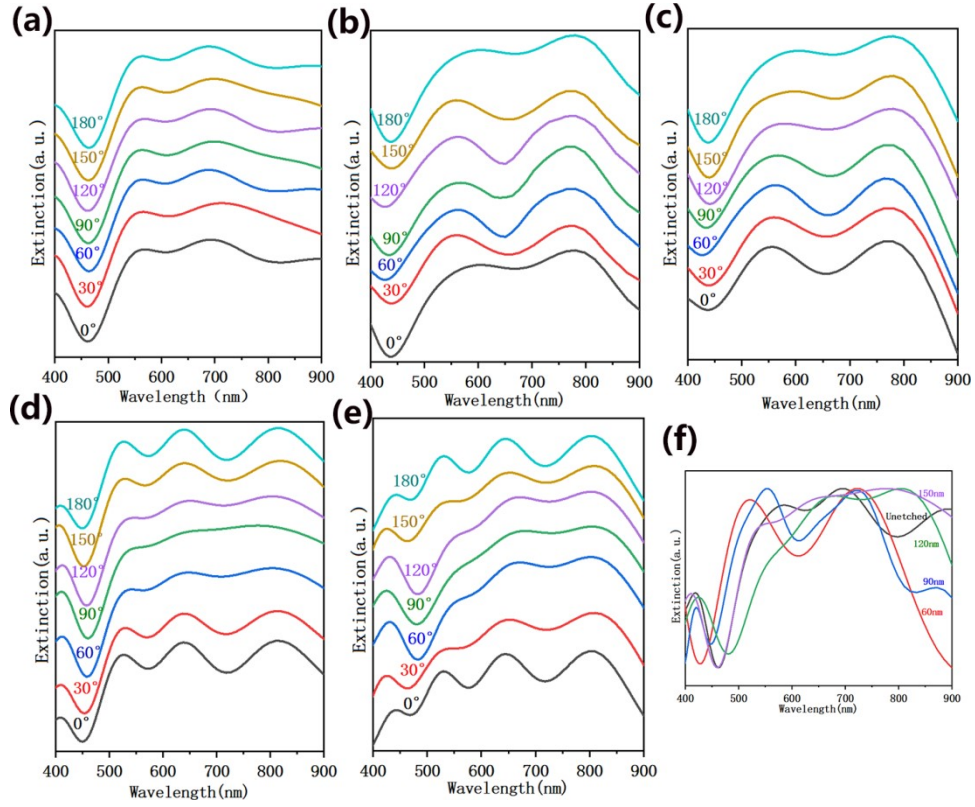

**Fig. S4** (a) Polarization extinction spectra of nanospheres arrays with silver. (b-e) Polarization extinction spectra of anisotropic nanocavity arrays with different structures. (f) The extinction spectra of E in (a-e) with the direction of 90°.

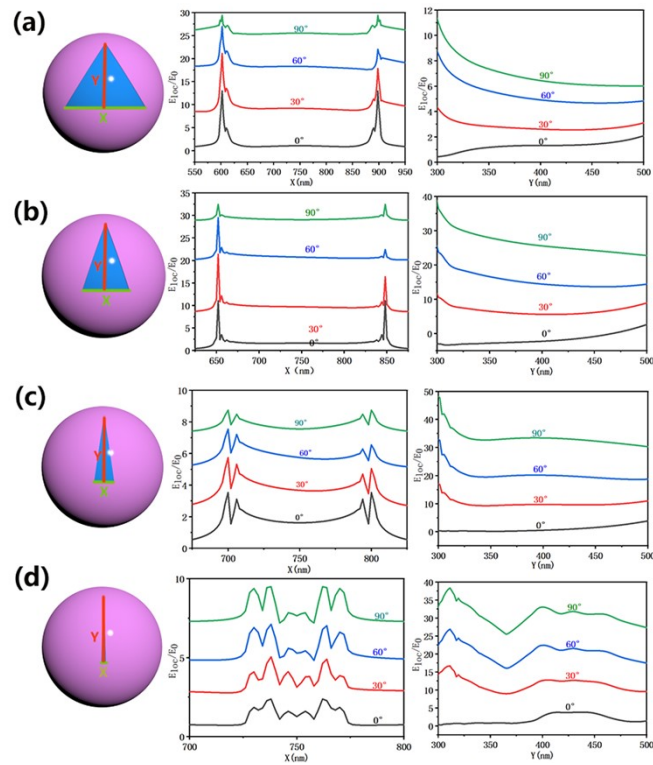

**Fig. S5** The linear diagram of electric field intensity variation for different Ag nanocavity, the X-line and Y-line in the left model diagram are respectively the position of the linear monitor, and the broken line graph on the right is the electric field intensity change trend chart in different electric field directions at the corresponding monitor. (b-d) The linear diagram of electric field intensity changes of the samples which etched at  $60^\circ$  and the thickness of the silver film is 60nm, 90nm, 120nm and 150nm respectively.
